# Supplementary material for: An up-converting phosphor technology-based lateral flow assay for point-of-collection detection of morphine and methamphetamine in saliva
Source: Royal Society of Chemistry journal article supplement (doi:10.1039/c8an00651b), 2018-01-01
Supplement: c8an00651b2.pdf [file c8an00651b2.pdf]

**Supplementary Table 2: List of fifty simulated samples tested by UPT-LFA and LC-MS. (Standard substances of morphine or methamphetamine were spiked into these saliva samples)**

| Diluted<br>Concentration<br>(ng mL <sup>-1</sup> ) | Mop-UPT-LFA                                         |              | LC-MS (Mop)                                         |              | Diluted<br>Concentration<br>(ng mL <sup>-1</sup> ) | Met-UPT-LFA                                         |              | LC-MS (Met)                                         |              |
|----------------------------------------------------|-----------------------------------------------------|--------------|-----------------------------------------------------|--------------|----------------------------------------------------|-----------------------------------------------------|--------------|-----------------------------------------------------|--------------|
|                                                    | Detected<br>Concentration<br>(ng mL <sup>-1</sup> ) | Recovery (%) | Detected<br>Concentration<br>(ng mL <sup>-1</sup> ) | Recovery (%) |                                                    | Detected<br>Concentration<br>(ng mL <sup>-1</sup> ) | Recovery (%) | Detected<br>Concentration<br>(ng mL <sup>-1</sup> ) | Recovery (%) |
| 40                                                 | 42.295                                              | 106%         | 41.326                                              | 103%         | 100                                                | 120.178                                             | 120%         | 119.094                                             | 119%         |
| 40                                                 | 38.545                                              | 96%          | 39.658                                              | 99%          | 100                                                | 87.724                                              | 88%          | 91.915                                              | 92%          |
| 40                                                 | 46.920                                              | 117%         | 34.324                                              | 86%          | 100                                                | 117.592                                             | 118%         | 115.360                                             | 115%         |
| 40                                                 | 45.219                                              | 113%         | 39.367                                              | 98%          | 100                                                | 98.832                                              | 99%          | 99.773                                              | 100%         |
| 40                                                 | 48.268                                              | 121%         | 35.920                                              | 90%          | 100                                                | 95.745                                              | 96%          | 98.910                                              | 99%          |
| 40                                                 | 47.140                                              | 118%         | 34.350                                              | 86%          | 100                                                | 108.302                                             | 108%         | 99.800                                              | 100%         |
| 40                                                 | 51.680                                              | 129%         | 28.700                                              | 72%          | 100                                                | 129.660                                             | 130%         | 94.269                                              | 94%          |
| 40                                                 | 37.770                                              | 94%          | 31.823                                              | 80%          | 100                                                | 102.058                                             | 102%         | 104.233                                             | 104%         |
| 40                                                 | 51.168                                              | 128%         | 38.238                                              | 96%          | 100                                                | 118.323                                             | 118%         | 89.887                                              | 90%          |
| 40                                                 | 46.056                                              | 115%         | 39.355                                              | 98%          | 100                                                | 101.164                                             | 101%         | 103.886                                             | 104%         |
| AVG                                                | 45.506                                              | 114%         | 36.306                                              | 91%          | AVG                                                | 107.958                                             | 108%         | 101.713                                             | 102%         |
| 20                                                 | 23.288                                              | 116%         | 17.571                                              | 88%          | 50                                                 | 60.126                                              | 120%         | 52.025                                              | 104%         |
| 20                                                 | 20.605                                              | 103%         | 22.543                                              | 113%         | 50                                                 | 38.557                                              | 77%          | 51.582                                              | 103%         |
| 20                                                 | 25.953                                              | 130%         | 18.148                                              | 91%          | 50                                                 | 44.008                                              | 88%          | 51.153                                              | 102%         |
| 20                                                 | 24.340                                              | 122%         | 19.761                                              | 99%          | 50                                                 | 47.605                                              | 95%          | 45.287                                              | 91%          |
| 20                                                 | 21.517                                              | 108%         | 18.064                                              | 90%          | 50                                                 | 59.836                                              | 120%         | 55.050                                              | 110%         |
| 20                                                 | 21.400                                              | 107%         | 20.582                                              | 103%         | 50                                                 | 48.244                                              | 96%          | 51.200                                              | 102%         |

**Supplementary Table 2: List of fifty simulated samples tested by UPT-LFA and LC-MS. (Standard substances of morphine or methamphetamine were spiked into these saliva samples)**

| Diluted<br>Concentration<br>(ng mL <sup>-1</sup> ) | Mop-UPT-LFA                                         |              | LC-MS (Mop)                                         |              | Diluted<br>Concentration<br>(ng mL <sup>-1</sup> ) | Met-UPT-LFA                                         |              | LC-MS (Met)                                         |              |
|----------------------------------------------------|-----------------------------------------------------|--------------|-----------------------------------------------------|--------------|----------------------------------------------------|-----------------------------------------------------|--------------|-----------------------------------------------------|--------------|
|                                                    | Detected<br>Concentration<br>(ng mL <sup>-1</sup> ) | Recovery (%) | Detected<br>Concentration<br>(ng mL <sup>-1</sup> ) | Recovery (%) |                                                    | Detected<br>Concentration<br>(ng mL <sup>-1</sup> ) | Recovery (%) | Detected<br>Concentration<br>(ng mL <sup>-1</sup> ) | Recovery (%) |
| 20                                                 | 19.402                                              | 97%          | 16.964                                              | 85%          | 50                                                 | 58.418                                              | 117%         | 48.994                                              | 98%          |
| 20                                                 | 20.279                                              | 101%         | 14.561                                              | 73%          | 50                                                 | 46.978                                              | 94%          | 59.792                                              | 120%         |
| 20                                                 | 19.858                                              | 99%          | 13.496                                              | 67%          | 50                                                 | 57.726                                              | 115%         | 47.624                                              | 95%          |
| 20                                                 | 17.530                                              | 88%          | 16.854                                              | 84%          | 50                                                 | 38.164                                              | 76%          | 44.989                                              | 90%          |
| 20                                                 | 23.153                                              | 116%         | 20.003                                              | 100%         | 50                                                 | 65.844                                              | 132%         | 58.734                                              | 117%         |
| 20                                                 | 21.458                                              | 107%         | 19.345                                              | 97%          | 50                                                 | 60.271                                              | 121%         | 49.594                                              | 99%          |
| 20                                                 | 19.806                                              | 99%          | 18.378                                              | 92%          | 50                                                 | 69.425                                              | 139%         | 48.635                                              | 97%          |
| 20                                                 | 20.771                                              | 104%         | 15.192                                              | 76%          | 50                                                 | 49.556                                              | 99%          | 50.971                                              | 102%         |
| 20                                                 | 20.495                                              | 102%         | 17.874                                              | 89%          | 50                                                 | 55.325                                              | 111%         | 56.391                                              | 113%         |
| 20                                                 | 18.868                                              | 94%          | 20.163                                              | 101%         | 50                                                 | 38.164                                              | 76%          | 39.224                                              | 78%          |
| 20                                                 | 20.441                                              | 102%         | 16.521                                              | 83%          | 50                                                 | 60.417                                              | 121%         | 50.025                                              | 100%         |
| 20                                                 | 22.954                                              | 115%         | 16.316                                              | 82%          | 50                                                 | 54.050                                              | 108%         | 49.805                                              | 100%         |
| 20                                                 | 22.888                                              | 114%         | 18.089                                              | 90%          | 50                                                 | 68.549                                              | 137%         | 46.048                                              | 92%          |
| 20                                                 | 22.500                                              | 113%         | 18.104                                              | 91%          | 50                                                 | 54.810                                              | 110%         | 51.481                                              | 103%         |
| AVG                                                | 21.375                                              | 107%         | 17.926                                              | 90%          | AVG                                                | 53.804                                              | 108%         | 50.430                                              | 101%         |
| 10                                                 | 10.563                                              | 106%         | 9.469                                               | 95%          | 25                                                 | 26.050                                              | 104%         | 19.241                                              | 77%          |
| 10                                                 | 10.232                                              | 102%         | 9.917                                               | 99%          | 25                                                 | 32.382                                              | 130%         | 22.759                                              | 91%          |

**Supplementary Table 2: List of fifty simulated samples tested by UPT-LFA and LC-MS. (Standard substances of morphine or methamphetamine were spiked into these saliva samples)**

| Diluted<br>Concentration<br>(ng mL <sup>-1</sup> ) | Mop-UPT-LFA                                         |              | LC-MS (Mop)                                         |              | Diluted<br>Concentration<br>(ng mL <sup>-1</sup> ) | Met-UPT-LFA                                         |              | LC-MS (Met)                                         |              |
|----------------------------------------------------|-----------------------------------------------------|--------------|-----------------------------------------------------|--------------|----------------------------------------------------|-----------------------------------------------------|--------------|-----------------------------------------------------|--------------|
|                                                    | Detected<br>Concentration<br>(ng mL <sup>-1</sup> ) | Recovery (%) | Detected<br>Concentration<br>(ng mL <sup>-1</sup> ) | Recovery (%) |                                                    | Detected<br>Concentration<br>(ng mL <sup>-1</sup> ) | Recovery (%) | Detected<br>Concentration<br>(ng mL <sup>-1</sup> ) | Recovery (%) |
| 10                                                 | 10.114                                              | 101%         | 7.335                                               | 73%          | 25                                                 | 28.246                                              | 113%         | 21.439                                              | 86%          |
| 10                                                 | 9.026                                               | 90%          | 8.088                                               | 81%          | 25                                                 | 29.853                                              | 119%         | 26.798                                              | 107%         |
| 10                                                 | 9.713                                               | 97%          | 6.773                                               | 68%          | 25                                                 | 29.576                                              | 118%         | 22.784                                              | 91%          |
| 10                                                 | 9.651                                               | 97%          | 7.610                                               | 76%          | 25                                                 | 19.767                                              | 79%          | 18.791                                              | 75%          |
| 10                                                 | 8.771                                               | 88%          | 9.420                                               | 94%          | 25                                                 | 25.504                                              | 102%         | 23.204                                              | 93%          |
| 10                                                 | 9.484                                               | 95%          | 10.436                                              | 104%         | 25                                                 | 20.613                                              | 82%          | 19.724                                              | 79%          |
| 10                                                 | 9.775                                               | 98%          | 9.465                                               | 95%          | 25                                                 | 23.351                                              | 93%          | 23.589                                              | 94%          |
| 10                                                 | 7.640                                               | 76%          | 9.631                                               | 96%          | 25                                                 | 20.816                                              | 83%          | 27.331                                              | 109%         |
| 10                                                 | 8.971                                               | 90%          | 8.416                                               | 84%          | 25                                                 | 39.602                                              | 158%         | 22.609                                              | 90%          |
| 10                                                 | 9.054                                               | 91%          | 8.455                                               | 85%          | 25                                                 | 26.517                                              | 106%         | 24.361                                              | 97%          |
| 10                                                 | 9.322                                               | 93%          | 8.407                                               | 84%          | 25                                                 | 18.100                                              | 72%          | 24.955                                              | 100%         |
| 10                                                 | 11.221                                              | 112%         | 7.528                                               | 75%          | 25                                                 | 24.501                                              | 98%          | 24.314                                              | 97%          |
| 10                                                 | 12.086                                              | 121%         | 8.871                                               | 89%          | 25                                                 | 20.580                                              | 82%          | 20.977                                              | 84%          |
| 10                                                 | 9.620                                               | 96%          | 10.419                                              | 104%         | 25                                                 | 20.249                                              | 81%          | 22.757                                              | 91%          |
| 10                                                 | 9.381                                               | 94%          | 11.248                                              | 112%         | 25                                                 | 18.938                                              | 76%          | 20.734                                              | 83%          |
| 10                                                 | 10.181                                              | 102%         | 9.019                                               | 90%          | 25                                                 | 21.617                                              | 86%          | 21.513                                              | 86%          |

**Supplementary Table 2: List of fifty simulated samples tested by UPT-LFA and LC-MS. (Standard substances of morphine or methamphetamine were spiked into these saliva samples)**

| Diluted<br>Concentration<br>(ng mL <sup>-1</sup> ) | Mop-UPT-LFA                                         |              | LC-MS (Mop)                                         |              |  | Diluted<br>Concentration<br>(ng mL <sup>-1</sup> ) | Met-UPT-LFA                                         |              | LC-MS (Met)                                         |              |
|----------------------------------------------------|-----------------------------------------------------|--------------|-----------------------------------------------------|--------------|--|----------------------------------------------------|-----------------------------------------------------|--------------|-----------------------------------------------------|--------------|
|                                                    | Detected<br>Concentration<br>(ng mL <sup>-1</sup> ) | Recovery (%) | Detected<br>Concentration<br>(ng mL <sup>-1</sup> ) | Recovery (%) |  |                                                    | Detected<br>Concentration<br>(ng mL <sup>-1</sup> ) | Recovery (%) | Detected<br>Concentration<br>(ng mL <sup>-1</sup> ) | Recovery (%) |
| 10                                                 | 10.148                                              | 101%         | 10.705                                              | 107%         |  | 25                                                 | 24.671                                              | 99%          | 20.828                                              | 83%          |
| 10                                                 | 11.026                                              | 110%         | 7.154                                               | 72%          |  | 25                                                 | 20.782                                              | 83%          | 29.461                                              | 118%         |
| AVG                                                | 9.799                                               | 98%          | 8.918                                               | 89%          |  | AVG                                                | 24.586                                              | 98%          | 22.909                                              | 92%          |
